# Supplementary material
Source: HighWire-hosted journal article supplement (https://bmjopen.bmj.com/content/11/7/e050713)
Supplement: inline-supplementary-material-2 [file inline-supplementary-material-2.pdf]

## Appendix 1: Data sharing plan. Clinicaltrials.gov record also updated.

|                                                       |                                                                                                                                                                                                                                                                                                                                                                               |
|-------------------------------------------------------|-------------------------------------------------------------------------------------------------------------------------------------------------------------------------------------------------------------------------------------------------------------------------------------------------------------------------------------------------------------------------------|
| Data Sharing Plan – FLASH-UK study                    |                                                                                                                                                                                                                                                                                                                                                                               |
| Individual participant data availability (anonymised) | Yes                                                                                                                                                                                                                                                                                                                                                                           |
| What data will be shared                              | Individual participant data that underlie the results reported in the primary study manuscript after deidentification (text, tables, figures and appendices)                                                                                                                                                                                                                  |
| What other documents will be available                | The study protocol, Statistical analysis plan, informed consent form, data dictionary and statistical code.                                                                                                                                                                                                                                                                   |
| Data availability                                     | Beginning 6 months and ending 3 years following article publication                                                                                                                                                                                                                                                                                                           |
| With whom                                             | Researchers who provide a methodologically sound proposal not overlapping with any planned secondary publications from the research team.                                                                                                                                                                                                                                     |
| For what type of analyses                             | To achieve aims in the approved proposal                                                                                                                                                                                                                                                                                                                                      |
| By what mechanism will data be available              | Proposals should be directed to Chief Investigator who will discuss such requested with the Trial Management Group (TMG).<br><a href="mailto:Lalantha.leelarathna@mft.nhs.uk">Lalantha.leelarathna@mft.nhs.uk</a> .<br><br>To gain access, data requesters will need to sign a data access agreement. Data will be available for 3 years at University Of Manchester website. |
